# Supplementary material for: Pathogenicity, tissue tropism and potential vertical transmission of SARSr-CoV-2 in Malayan pangolins
Source: bioRxiv or medRxiv preprint supplement (doi:10.1101/2020.06.22.164442), 2020-06-22

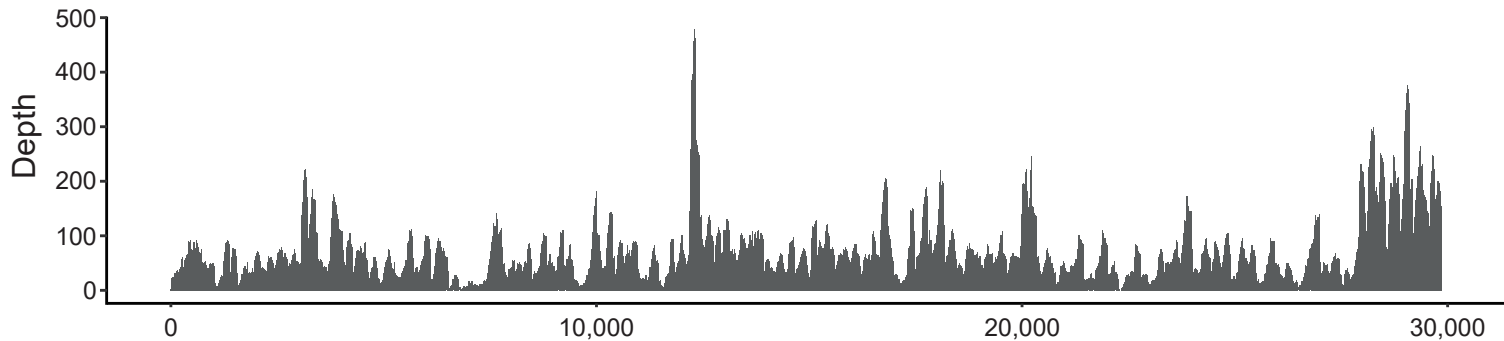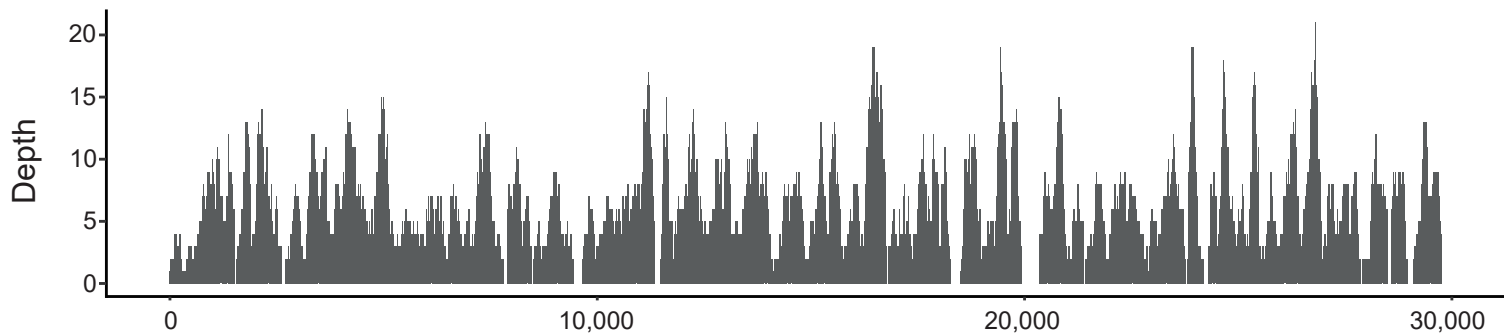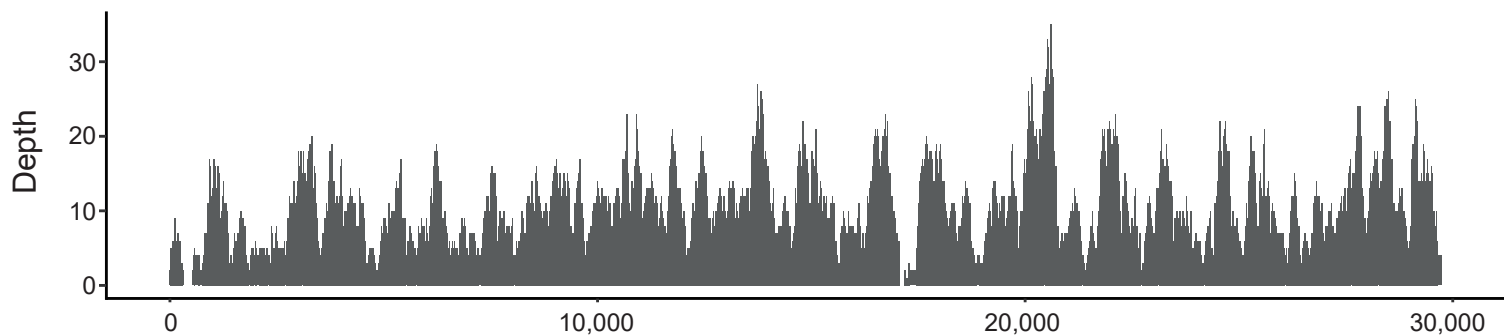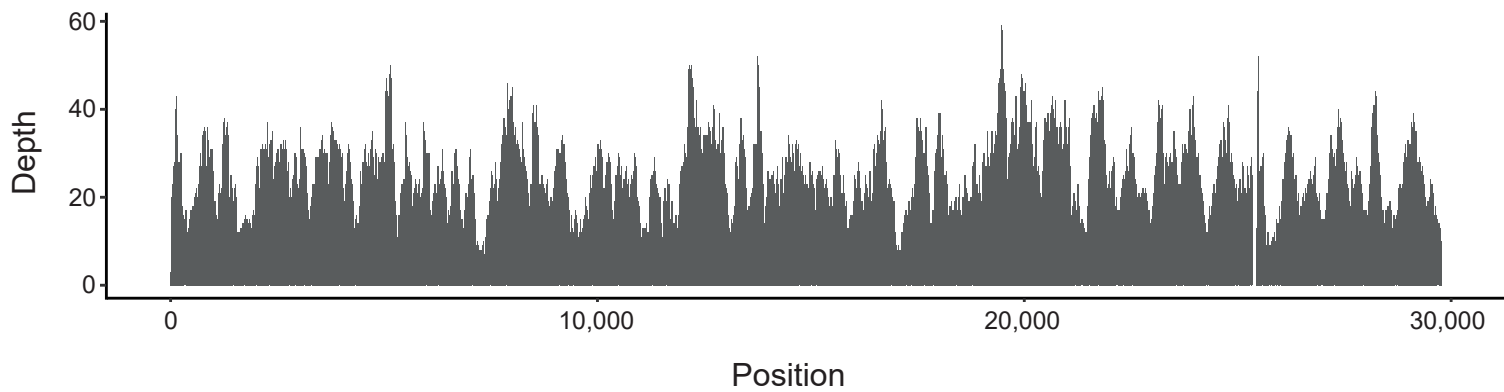

Supplement: Supplementary file [file media-1.pdf]
